# Supplementary material for: Ultrahigh capacity potassium-based dual carbon batteries with a high concentration electrolyte
Source: Royal Society of Chemistry journal article supplement (doi:10.1039/d2se00636g), 2022-01-01
Supplement: d2se00636g1.pdf [file d2se00636g1.pdf]

## Supplementary data

### **Ultrahigh capacity potassium-based dual carbon batteries with high concentration electrolyte**

Qing Wang<sup>a,b,c,d,e\*</sup>, Dengyang Wang<sup>a,b</sup>, Mingxiu Tan<sup>a,b</sup>, Wuxin Liu<sup>a,b</sup>, Meng Zhou<sup>a,b</sup>,  
Shaohua Luo<sup>a,b,c,d,e\*\*</sup>, Pengqing Hou<sup>a,b,c,d,e</sup>, Yahui Zhang<sup>a,b,c,d,e</sup>, Shengxue Yan<sup>a,b</sup>, Xin  
Liu<sup>a,b,c,d,e</sup>

<sup>a</sup> School of Materials Science and Engineering, Northeastern University, Shenyang  
110819, China

<sup>b</sup> State Key Laboratory of Rolling and Automation, Northeastern University,  
Shenyang 110819, China

<sup>c</sup> School of Resources and Materials, Northeastern University at Qinhuangdao,  
Qinhuangdao 066004, China

<sup>d</sup> Hebei Key Laboratory of Dielectric and Electrolyte Functional Material,  
Qinhuangdao 066004, China

<sup>e</sup> Qinhuangdao Key Laboratory of Advanced Energy Storage and Conversion  
Technology, Qinhuangdao 066004, China

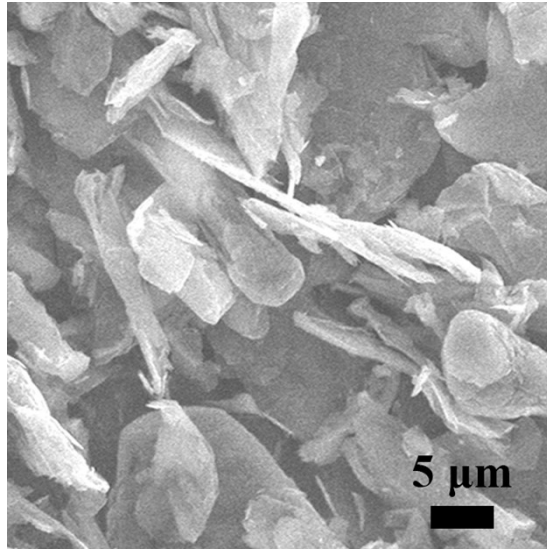

**Fig.S1** SEM image of pristine expanded graphite.

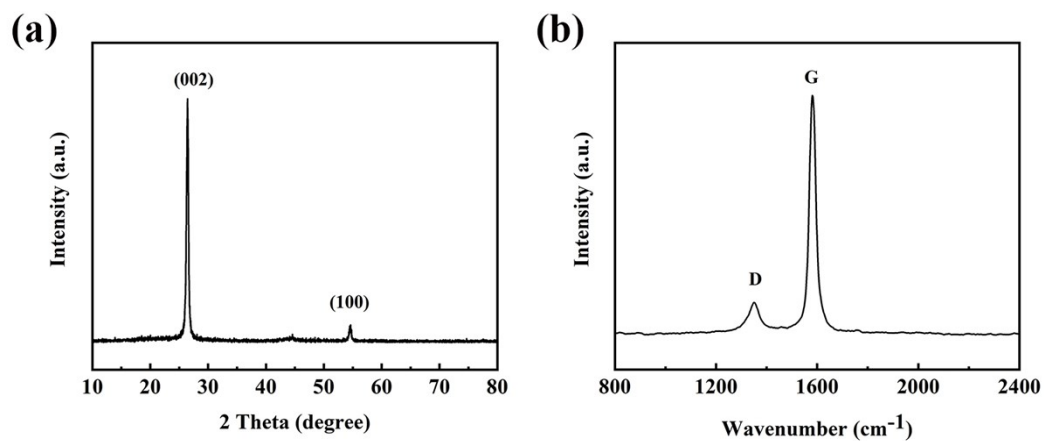

**Fig.S2** (a) XRD pattern and (b) Raman spectra of EG.

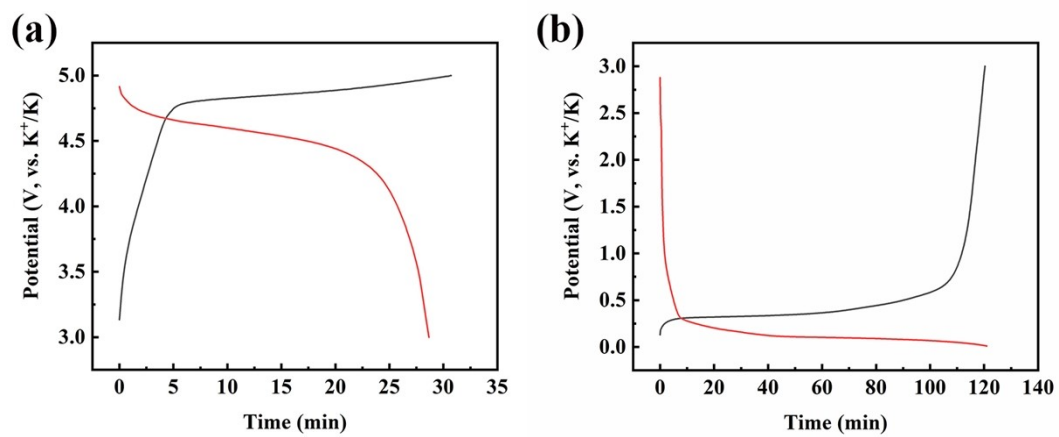

**Fig.S3** (a) Potassium-graphite cathode half-cell charge-discharge curve, (b) Potassium-graphite anode half-cell charge-discharge curve.

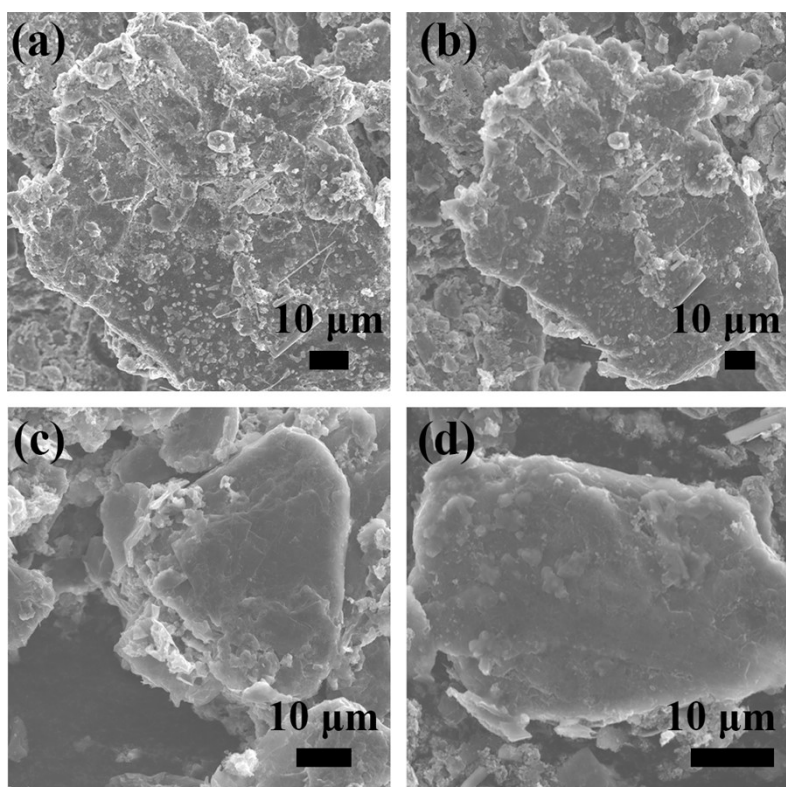

**Fig. S4** SEM images of expanded graphite cathode after cycling under different concentrations of electrolytes: (a) 1 M; (b) 2 M; (c) 3 M; (d) 4 M.

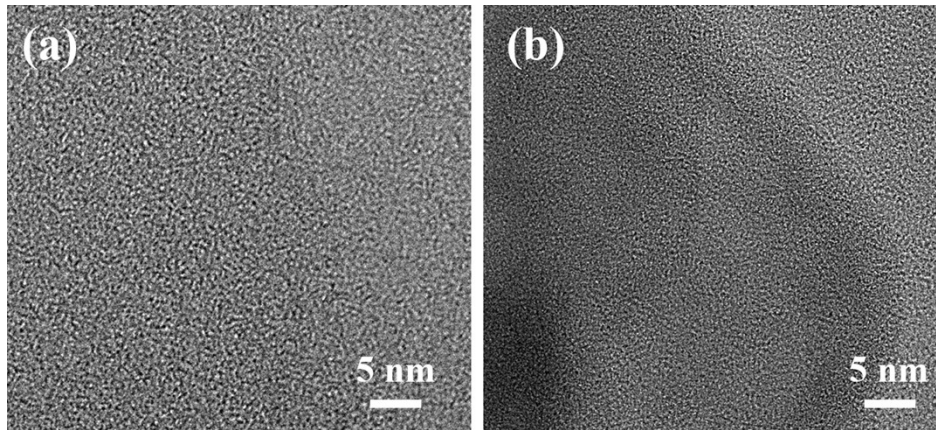

**Fig. S5** TEM images of expanded graphite electrode before and after cycling.

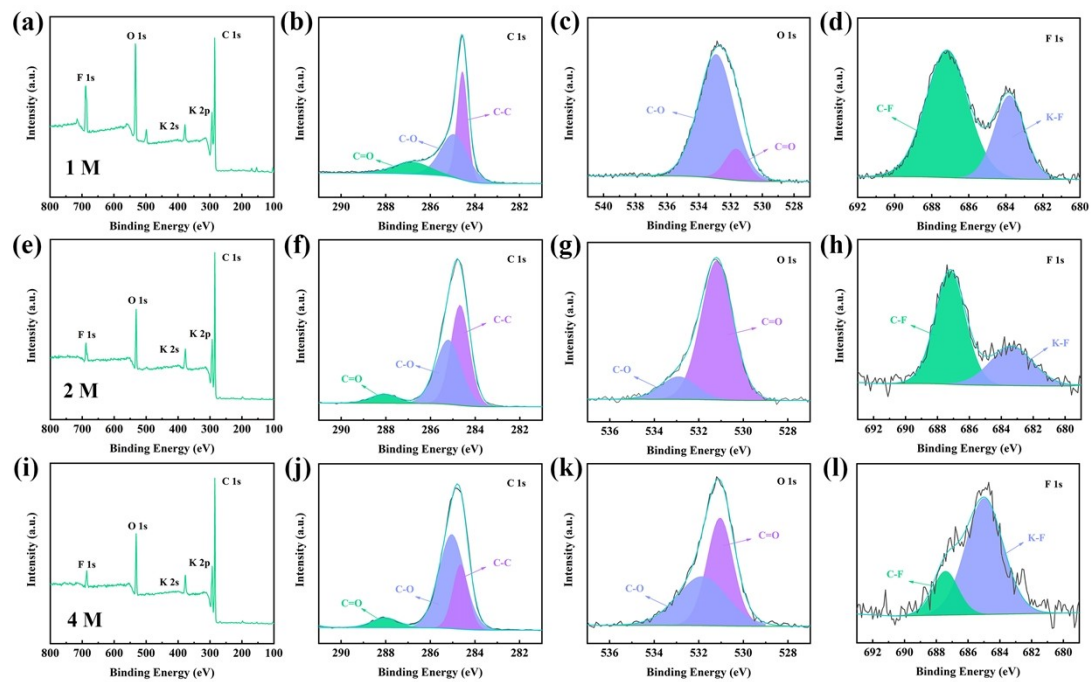

**Fig.S6** XPS spectra of graphite electrode after cycling in KPF<sub>6</sub>/EC: DEC: PC:(a-d) 1 M;(e-h) 2 M; (i-l) 4 M.
